# Supplementary material
Source: PubMed Central journal article supplement (PMC2865215)
Supplement: Supp_Table.pdf [file Supp_Table.pdf]

SUPPLEMENTARY TABLE 1. INTEGRANTS WITHIN REFSEQ GENES OR WITHIN 50 KB OF REFSEQ GENE TRANSCRIPTION START SITES

| <i>Animal</i> | <i>DPT<sup>a</sup></i> | <i>Name</i>      | <i>Description</i>                                              | <i>Location<sup>b</sup></i> |
|---------------|------------------------|------------------|-----------------------------------------------------------------|-----------------------------|
| G115          | 659                    | <i>ATP11B</i>    | ATPase, class VI, type 11B                                      | Within                      |
| G115          | 659                    | <i>CD2</i>       | CD2 molecule                                                    | 9850 (u)                    |
| G115          | 659                    | <i>EIF4G3</i>    | eukaryotic translation initiation factor 4 gamma, 3             | Within                      |
| G115          | 659                    | <i>LOC154872</i> | hypothetical protein LOC154872                                  | 31040 (u)                   |
| G136          | 801                    | <i>DLG2</i>      | discs, large homolog 2 (Drosophila)                             | Within                      |
| G136          | 801                    | <i>ERBB2IP</i>   | erbb2 interacting protein                                       | Within                      |
| G136          | 801                    | <i>ITPR1</i>     | inositol 1,4,5-triphosphate receptor, type 1                    | Within                      |
| G136          | 801                    | <i>OXR1</i>      | oxidation resistance 1                                          | Within                      |
| G206          | 2002                   | <i>ROBO1</i>     | roundabout, axon guidance receptor, homolog 1                   | Within                      |
| G206          | 2002                   | <i>SGCD</i>      | sarcoglycan, delta                                              | Within                      |
| G206          | 2002                   | <i>TMEM168</i>   | transmembrane protein 168                                       | Within                      |
| G206          | 2002                   | <i>TOX</i>       | thymocyte selection-associated high mobility group box          | Within                      |
| G221          | 363                    | <i>G2E3</i>      | G2/M-phase specific E3 ubiquitin ligase                         | Within                      |
| G221          | 363                    | <i>HRSP12</i>    | Heat-responsive protein 12                                      | 19700 (d)                   |
| G221          | 363                    | <i>MTF1</i>      | metal-regulatory transcription factor 1                         | Within                      |
| G221          | 363                    | <i>SPRY2</i>     | sprouty homolog 2 (Drosophila)                                  | 11235 (d)                   |
| G221          | 363                    | <i>TMEM144</i>   | transmembrane protein 144                                       | 48735 (d)                   |
| G236          | 1862                   | <i>CTNNA3</i>    | catenin, alpha 3                                                | Within                      |
| G236          | 1862                   | <i>DST</i>       | dystonin                                                        | Within                      |
| G236          | 1862                   | <i>TAF1D</i>     | TATA box binding protein-associated factor, RNA polymerase I, D | 47498 (d)                   |
| G236          | 1862                   | <i>TUBA1B</i>    | tubulin, alpha 1b                                               | 28455 (u)                   |
| G293          | 1233                   | <i>BCL2L13</i>   | BCL2-like 13 (apoptosis facilitator)                            | Within                      |
| G293          | 1233                   | <i>CADM2</i>     | cell adhesion molecule 2                                        | Within                      |
| G293          | 1233                   | <i>CNTN1</i>     | contactin 1                                                     | Within                      |
| G293          | 1233                   | <i>GPBP1L1</i>   | GC-rich promoter binding protein 1-like 1                       | Within                      |
| G293          | 1233                   | <i>MAGT1</i>     | magnesium transporter 1                                         | Within                      |
| G293          | 1233                   | <i>RGS18</i>     | regulator of G-protein signaling 18                             | Within                      |
| G293          | 1233                   | <i>SGMS1</i>     | sphingomyelin synthase 1                                        | Within                      |

<sup>a</sup>Days after transplantation.

<sup>b</sup>Within Refseq gene transcript or distance upstream (u) or downstream (d) from Refseq gene transcription start site.
